# Supplementary material
Source: PubMed Central journal article supplement (PMC6546437)

# Supplementary Figure 6

a.

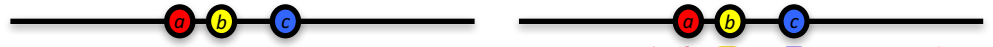

b.

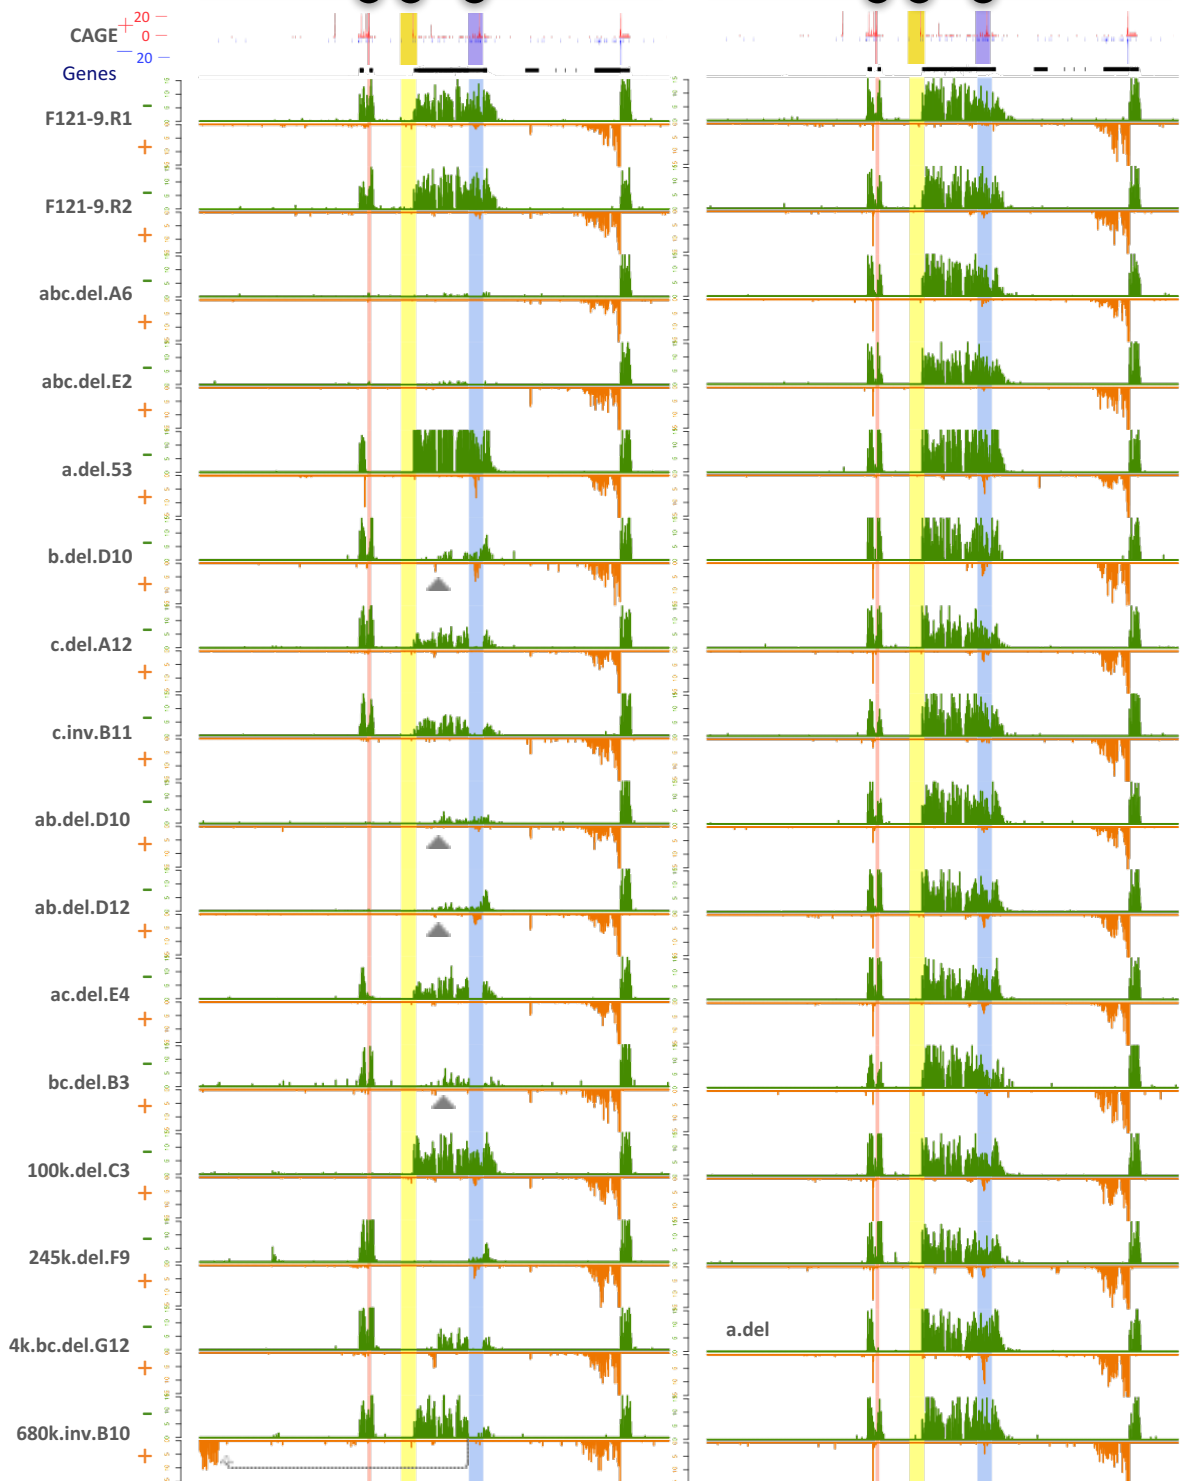

Supplement: NIHMS1515403-supplement-10.pdf [file NIHMS1515403-supplement-10.pdf]

# Supplementary Figure 1

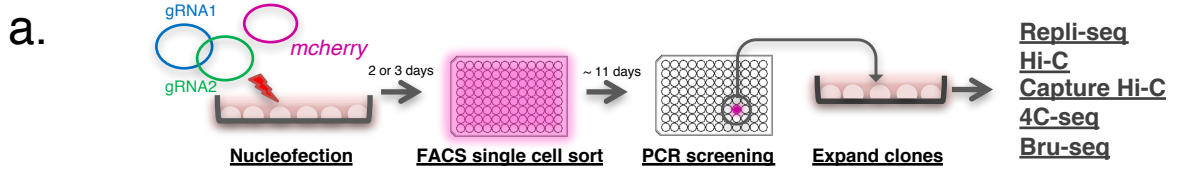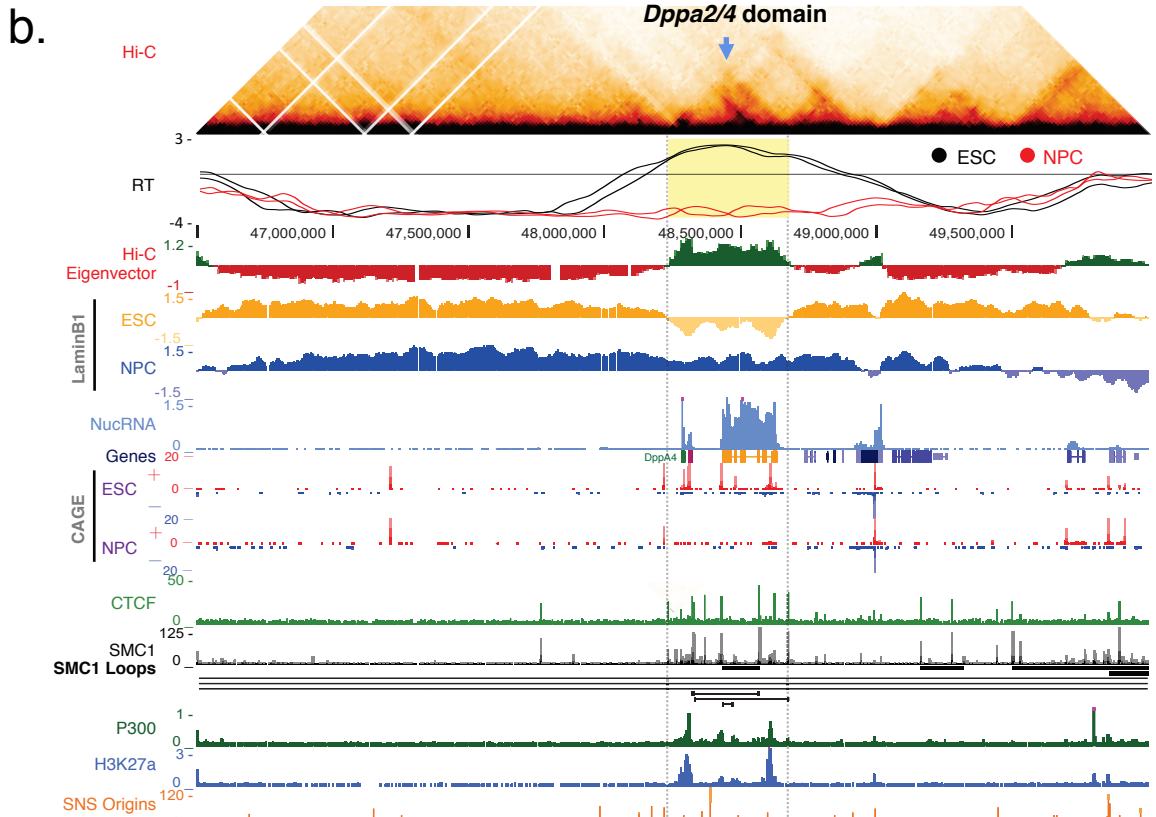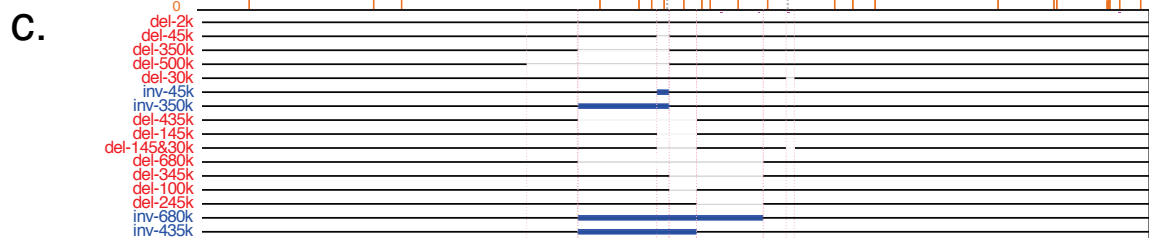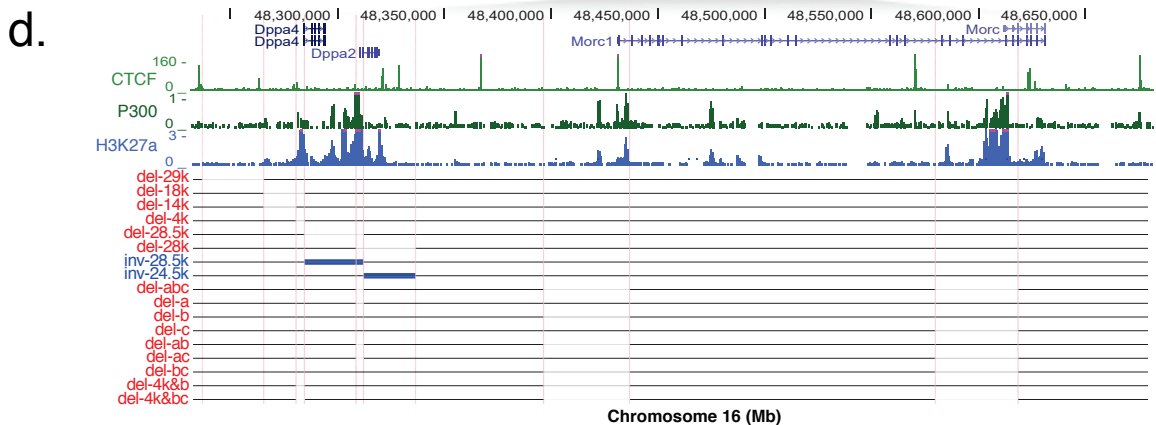

# Supplementary Figure 1e

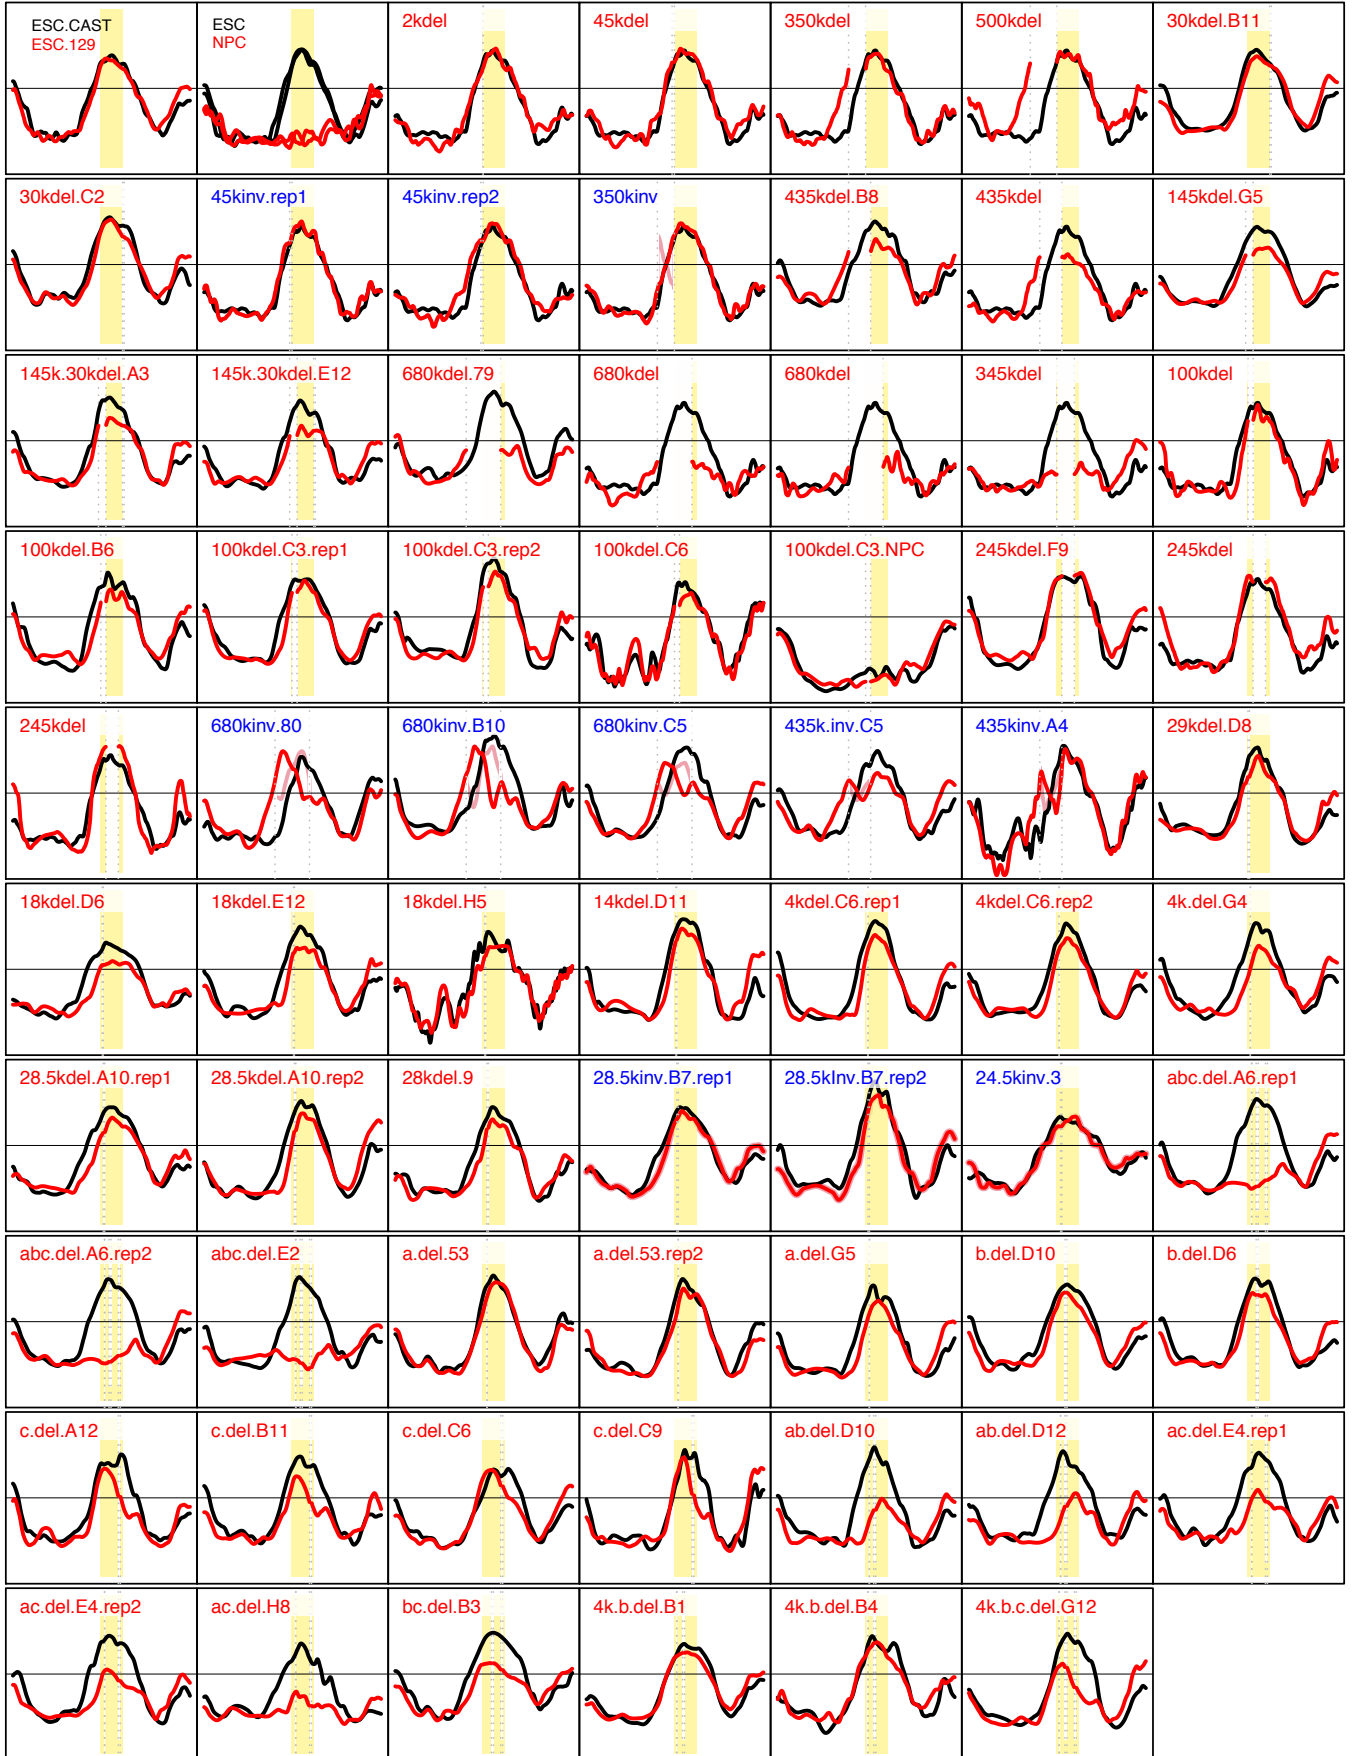

# Supplementary Figure 1f

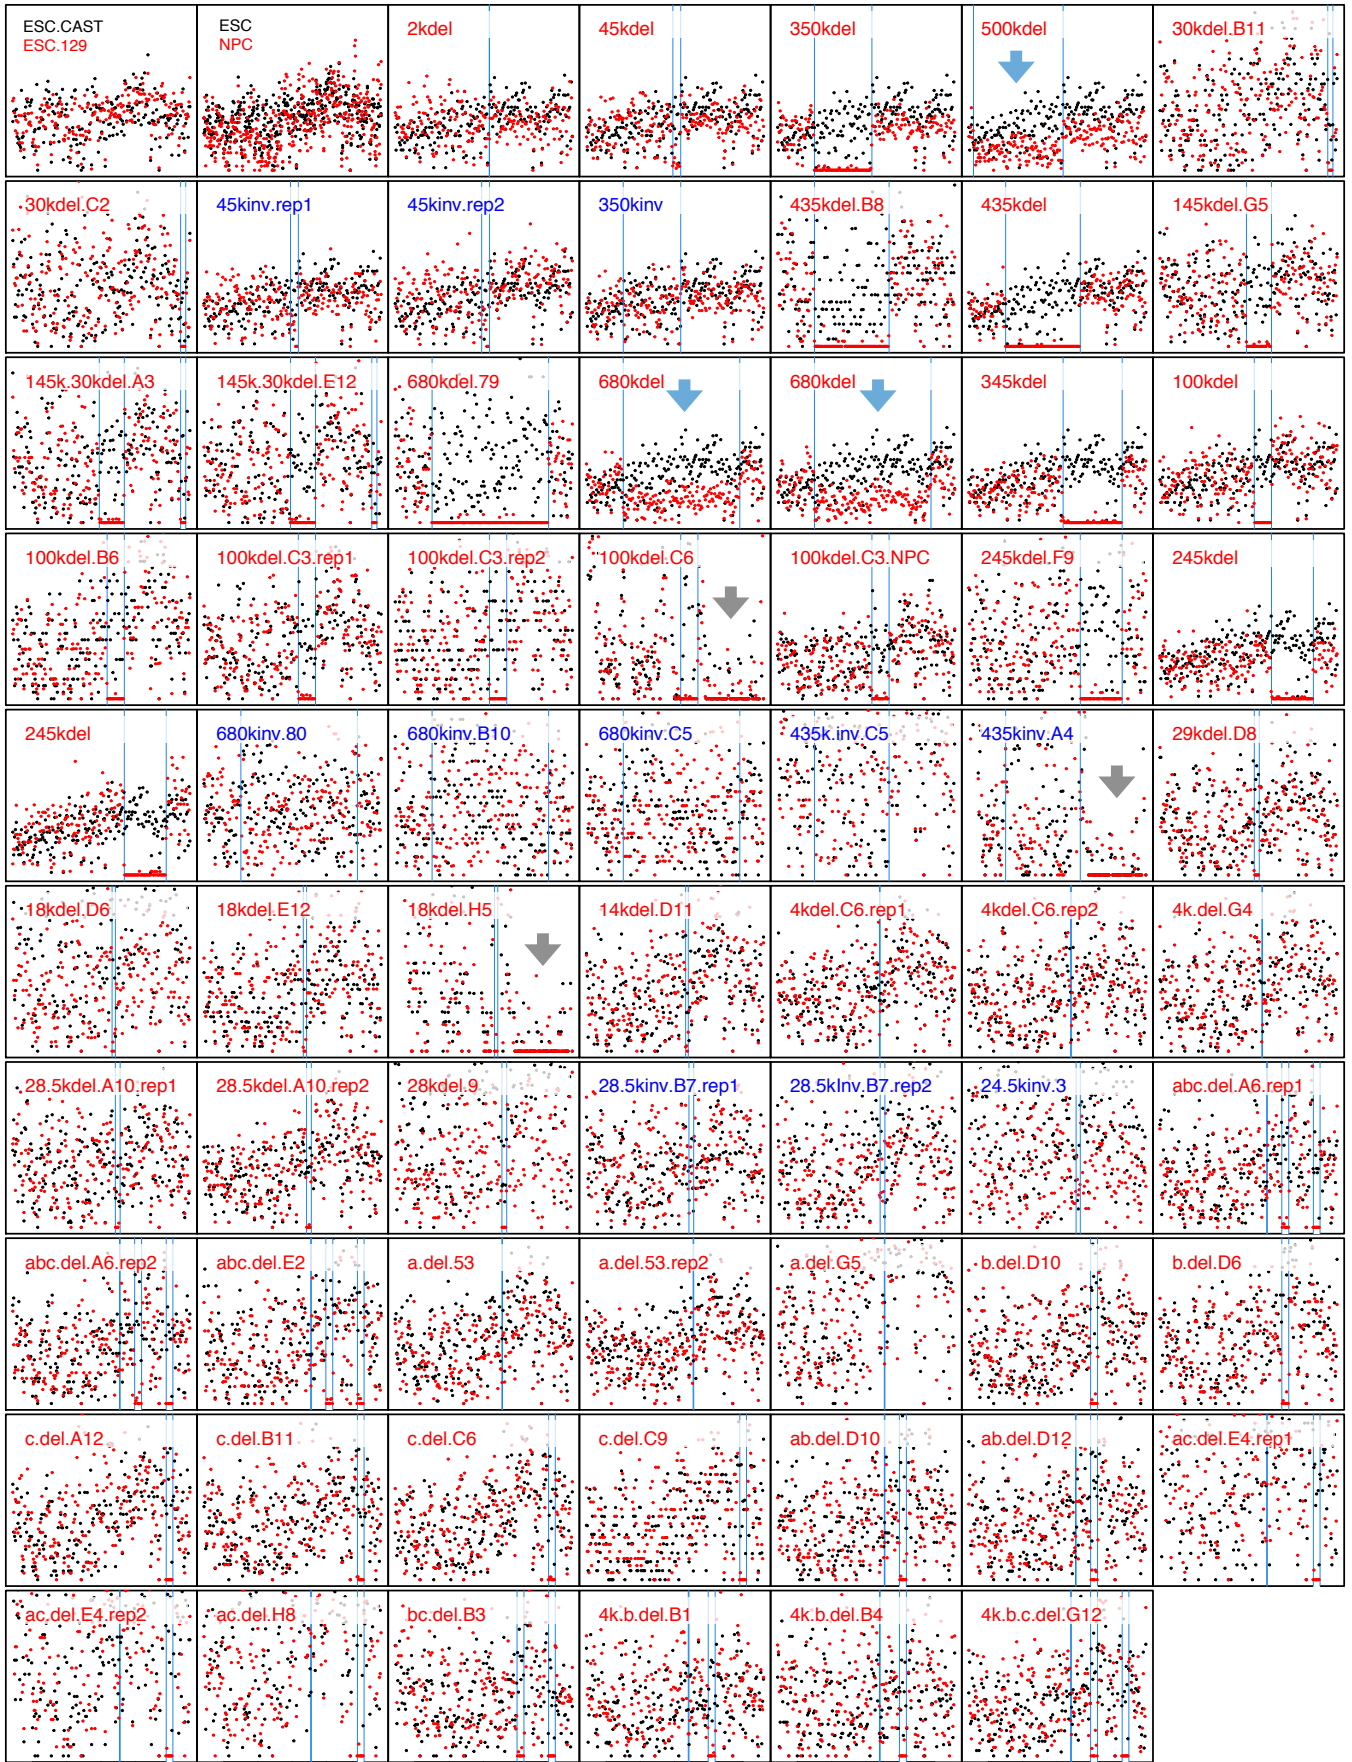

47800000 48400000 47800000 48400000 47800000 48400000 47800000 48400000 47800000 48400000 47800000 48400000

Supplement: NIHMS1515403-supplement-5.pdf [file NIHMS1515403-supplement-5.pdf]

## Supplementary Figure 2

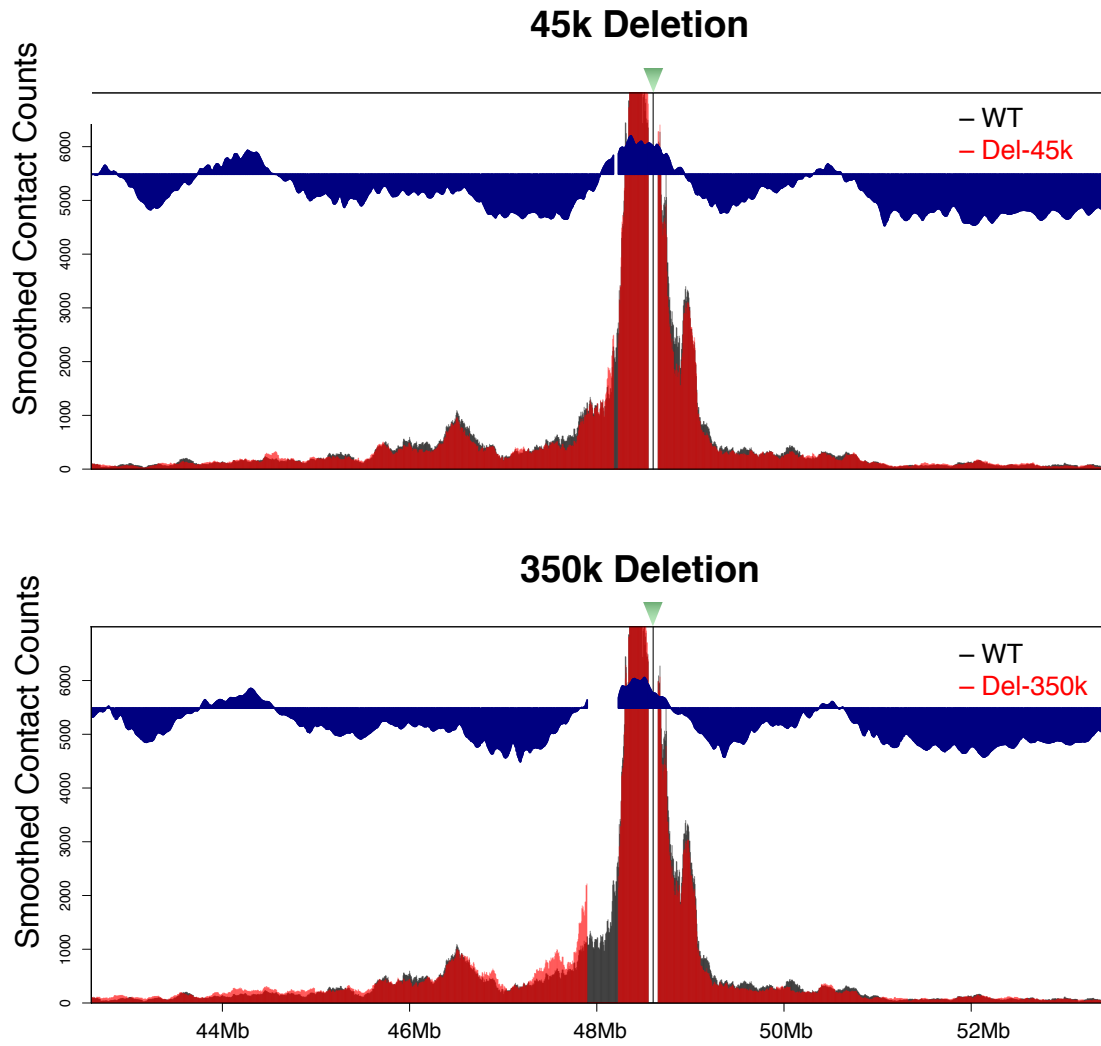

Supplement: NIHMS1515403-supplement-6.pdf [file NIHMS1515403-supplement-6.pdf]

# Supplementary Figure 3

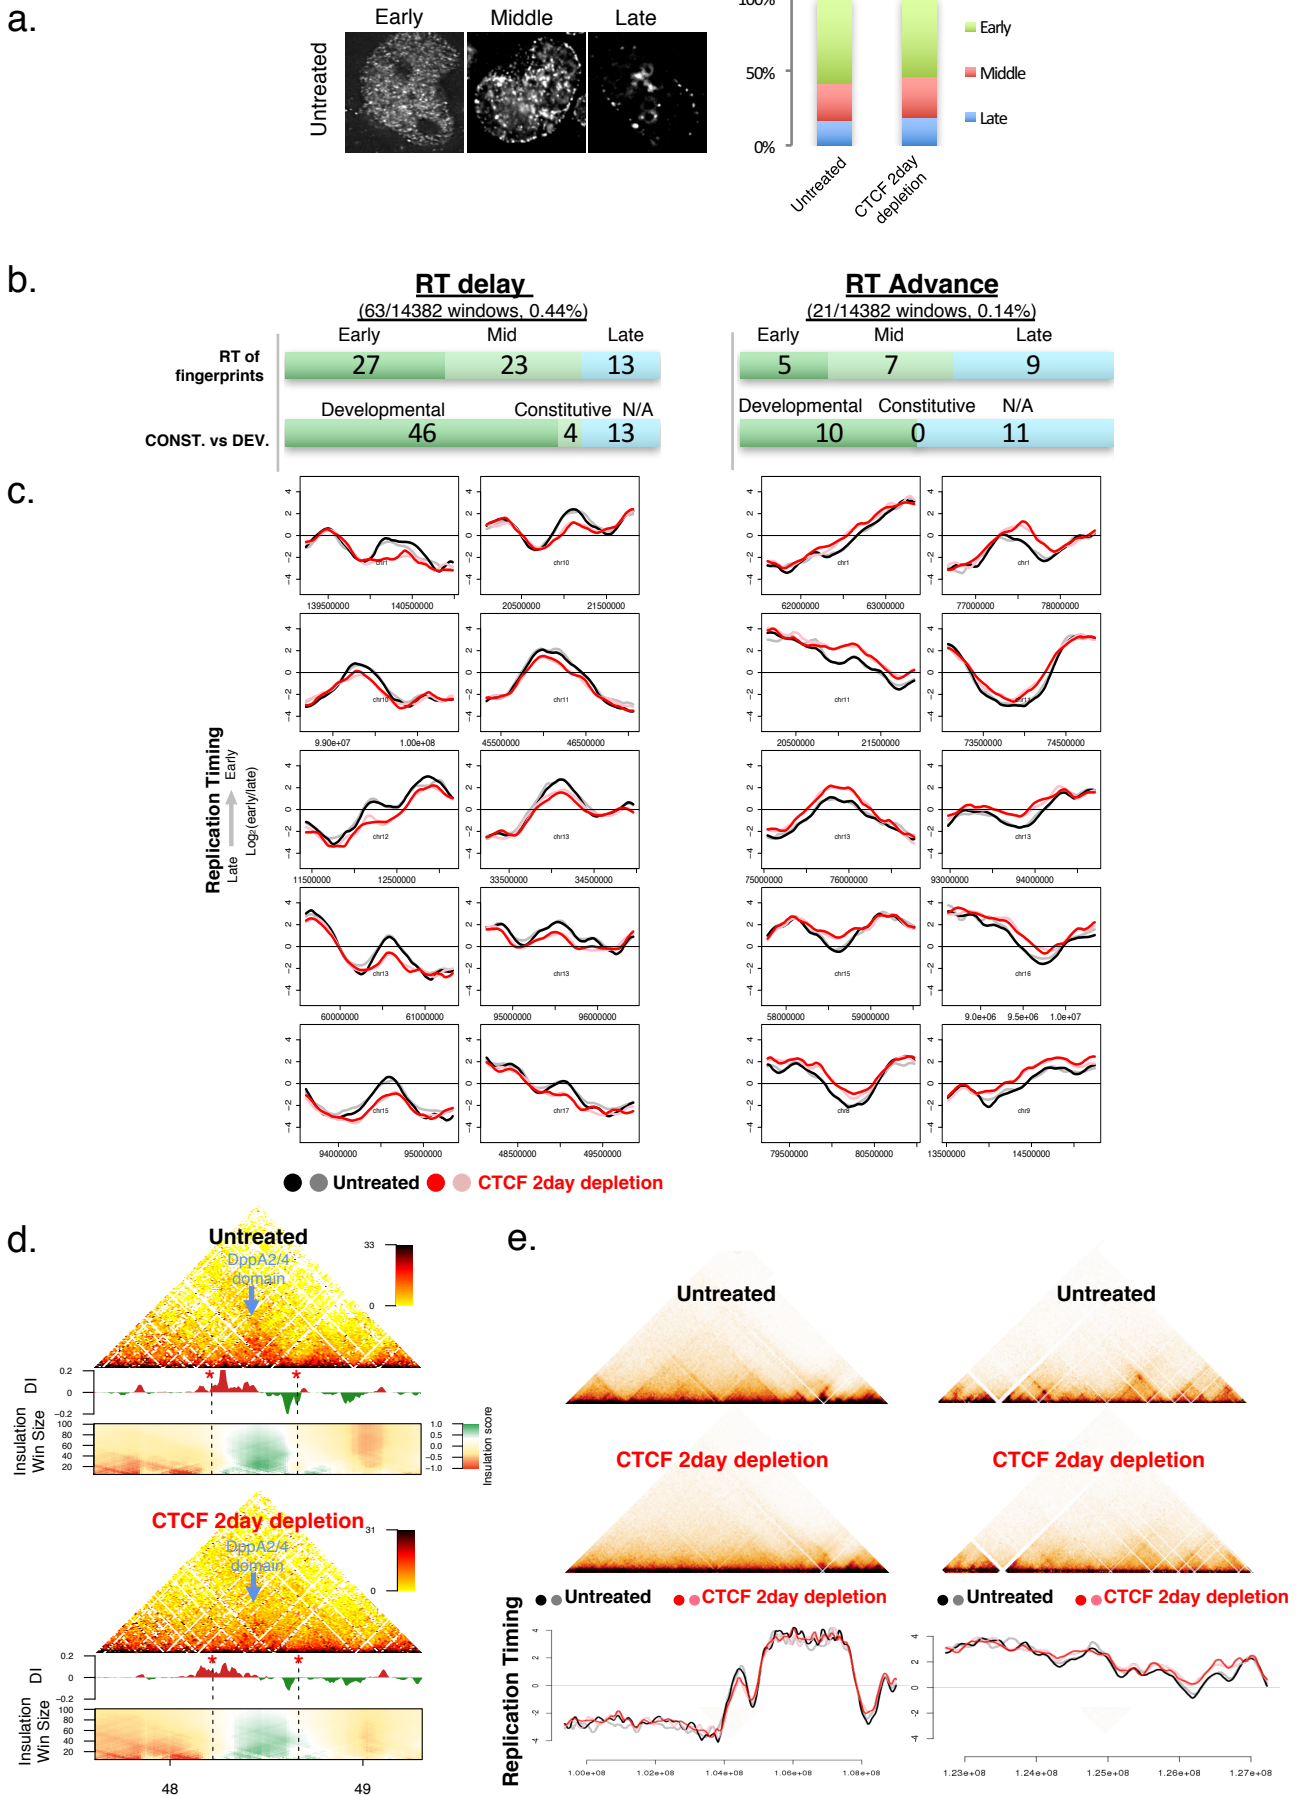

Supplement: NIHMS1515403-supplement-7.pdf [file NIHMS1515403-supplement-7.pdf]

# Supplementary Figure 4

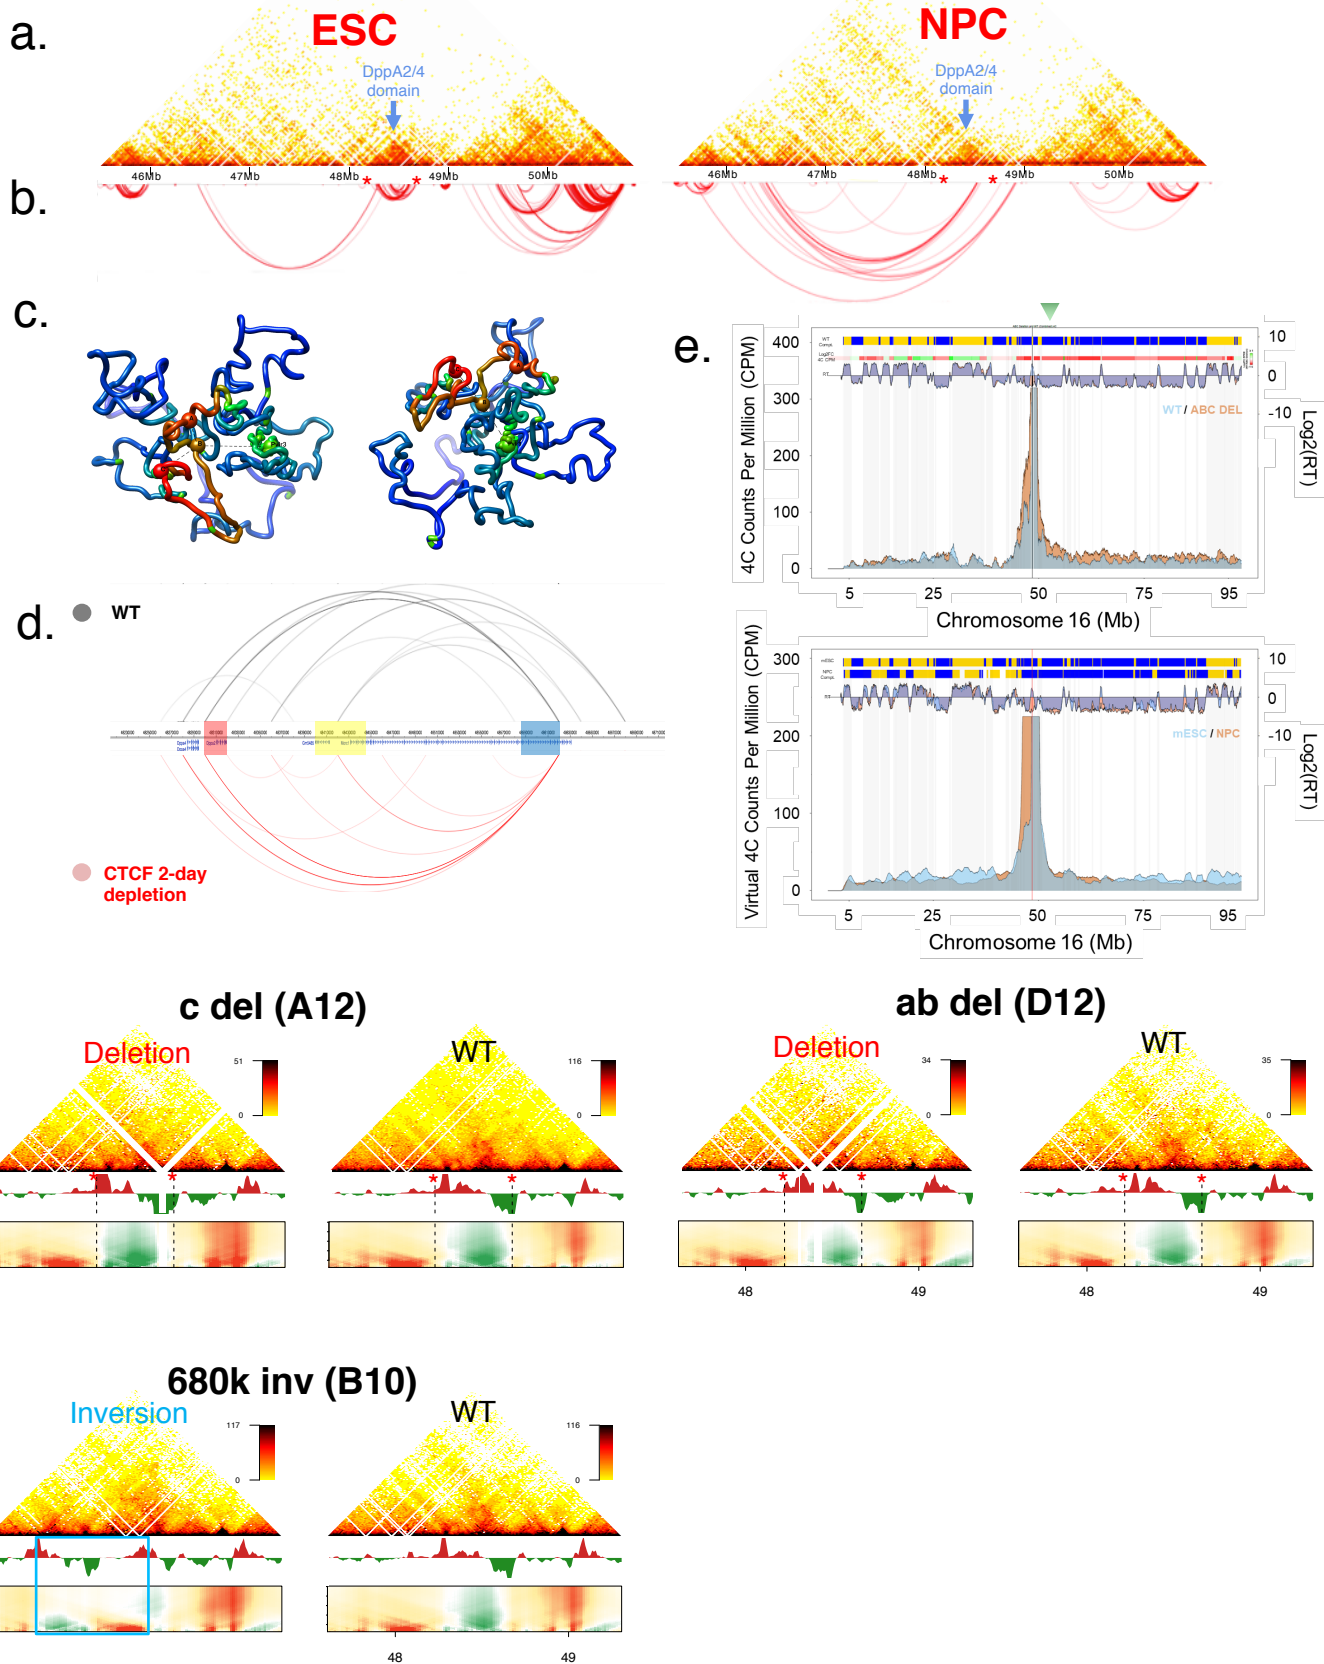

Supplement: NIHMS1515403-supplement-8.pdf [file NIHMS1515403-supplement-8.pdf]

# Supplementary Figure 5

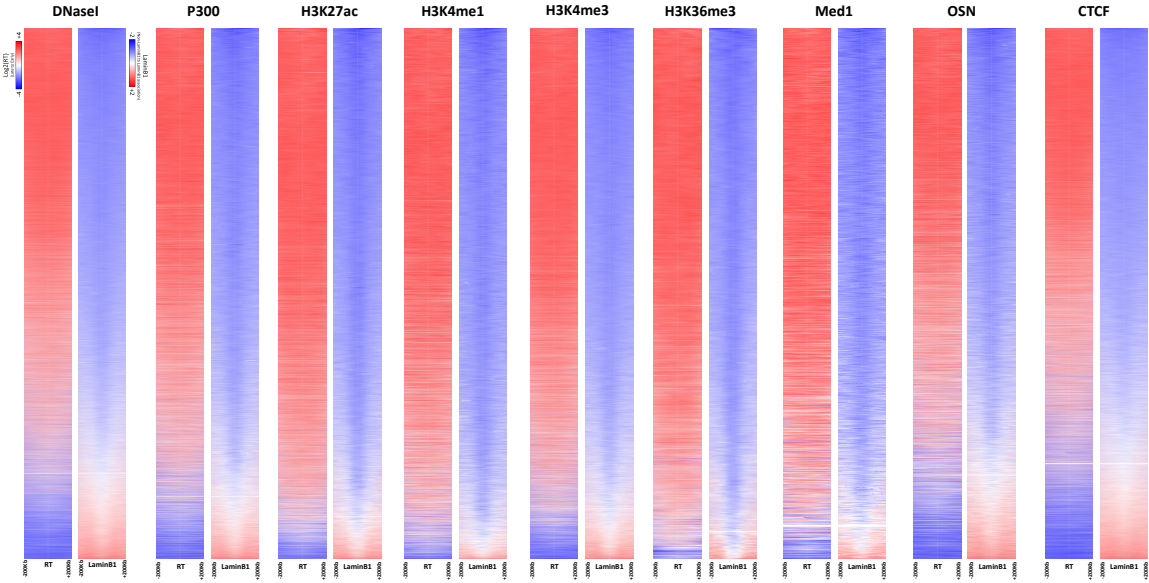

Supplement: NIHMS1515403-supplement-9.pdf [file NIHMS1515403-supplement-9.pdf]
